# Supplementary material for: Carbon Nanotubes for Confinement-Induced Energetic Nanomaterials
Source: MDPI journal article supplement (doi:10.3390/nano13121845), 2023-06-12
Supplement: s1 [file s1]

## Carbon nanotubes for confinement-induced energetic nanomaterials

*Ruben Acevedo, Brigitte Soula, Anne Marie Galibert, and Emmanuel Flahaut\**

CIRIMAT, Université Toulouse 3 Paul Sabatier, Toulouse INP, CNRS, Université de Toulouse,  
118 Route de Narbonne, 31062 Toulouse Cedex 9 - France  
E-mail: emmanuel.flahaut@univ-tlse3.fr

### Supplementary Data

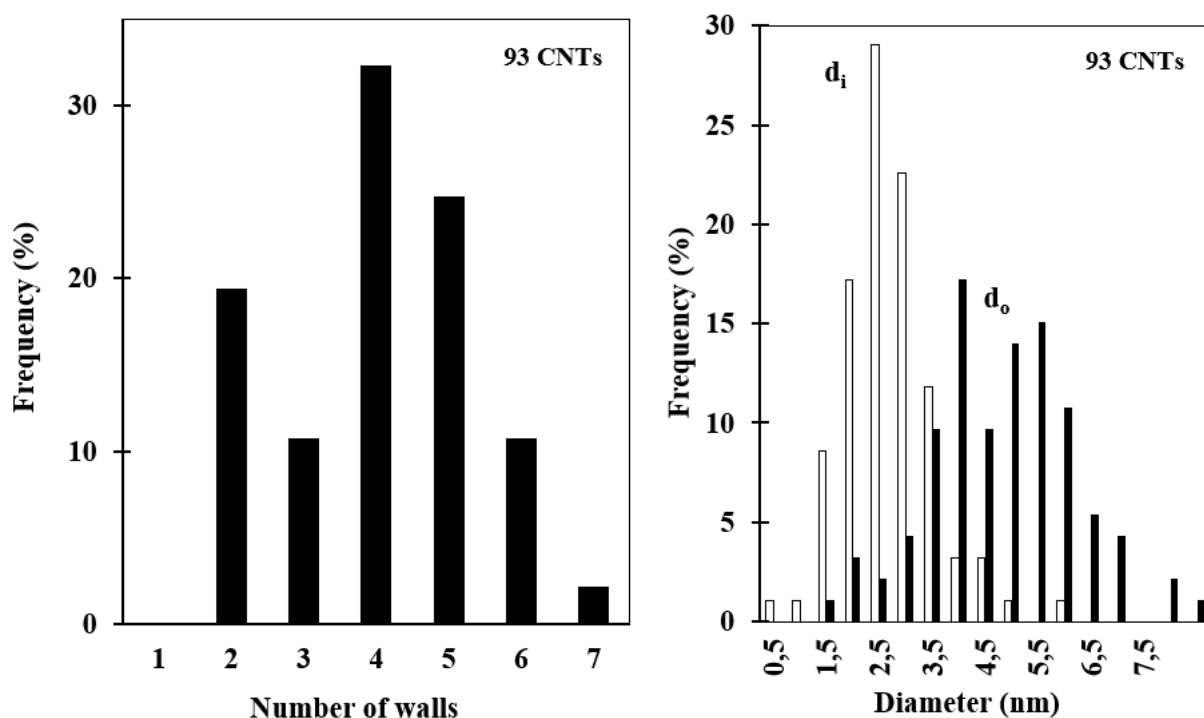

**Figure S1.** Distribution of the number of walls and diameters (inner, outer) for the MWNTs used in this work.

**Table S1.** DSC representative data for each type of nanomaterial with the Werner complex.

**The compounds and their data in bold are those listed in table 1 of the publication.**

| Compound              | sample name         | mass (mg)   | Normalized energy output (kJ/g) | Max. Peak T (°C) | FWHM (°C)    |
|-----------------------|---------------------|-------------|---------------------------------|------------------|--------------|
| Werner complex (W)    | <b>AGA305</b>       | <b>1.02</b> | <b>0.5</b>                      | <b>253.2</b>     | <b>3.2</b>   |
|                       | commercial          | 1.04        | 0.33                            | 251.7            | 3.4          |
| W@ox-DWNT             | <b>RA070314_ImW</b> | <b>1.0</b>  | <b>14.6</b>                     | <b>396.3</b>     | <b>52.0</b>  |
| W@ox-MWNT             | AT2+MW              | 1.88        | 21.41                           | 350.8            | 68.0         |
|                       | AT5+MW              | 1.28        | 14.62                           | 470.0            | 65.0         |
|                       | AT6A+MW             | 1.1         | 21.86                           | 372.5            | 93.0         |
|                       | <b>AT7+MW</b>       | <b>0.92</b> | <b>23.3</b>                     | <b>342.2</b>     | <b>59.5</b>  |
|                       | CCIAL+MW            | 0.82        | 26.79                           | 380.0            | 100.7        |
| W@ox-MWNT<br>(reflux) | RAT8E+MW            | 1.68        | 22.65                           | 490.0            | 90.0         |
|                       | <b>RAT8L+MW</b>     | <b>0.85</b> | <b>28.09</b>                    | <b>504.8</b>     | <b>113.3</b> |
| W@ox-CNF              | AT2+NF              | 1.03        | 15.06                           | 512.8            | 121.7        |
|                       | AT5+NF              | 1.08        | 13.21                           | 519.8            | 84.3         |
|                       | AT5'+NF             | 1.47        | 12.0                            | 538.8            | 92.4         |
|                       | <b>AT6A+NF</b>      | <b>1.03</b> | <b>12.07</b>                    | <b>515.3</b>     | <b>128.0</b> |
|                       | CCIAL+NF            | 0.62        | 12.18                           | 515.5            | 86.9         |

Thermogravimetric analysis data for the samples with names in bold in table S1 are shown in the next pages.

<sup>Λ</sup>exo

AGA305

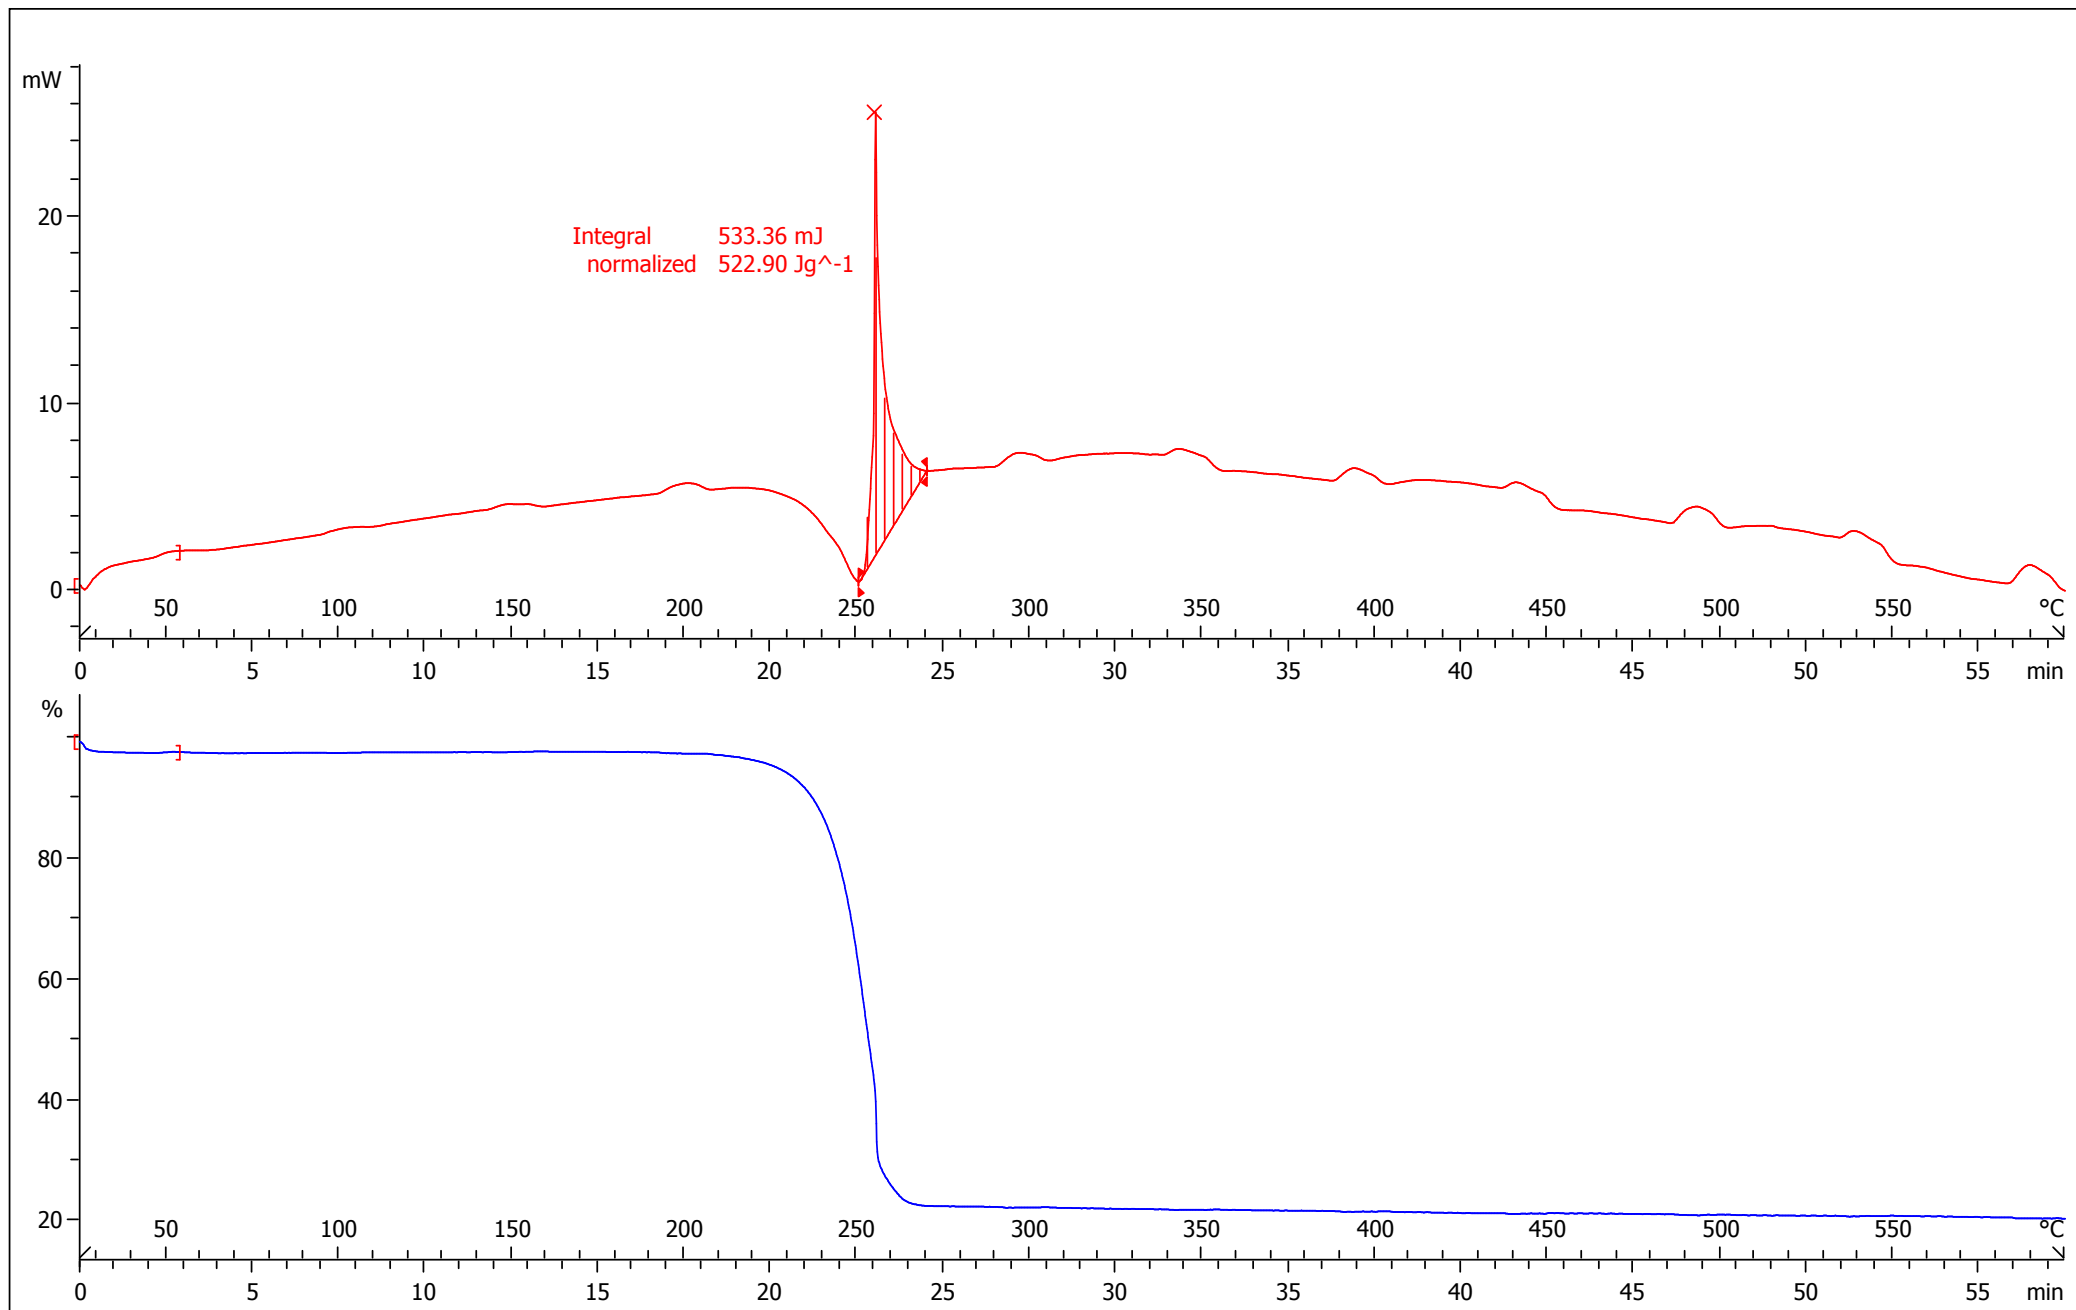

exo

140319-RA070314-Im-W-DW

19.03.2014 13:16:13

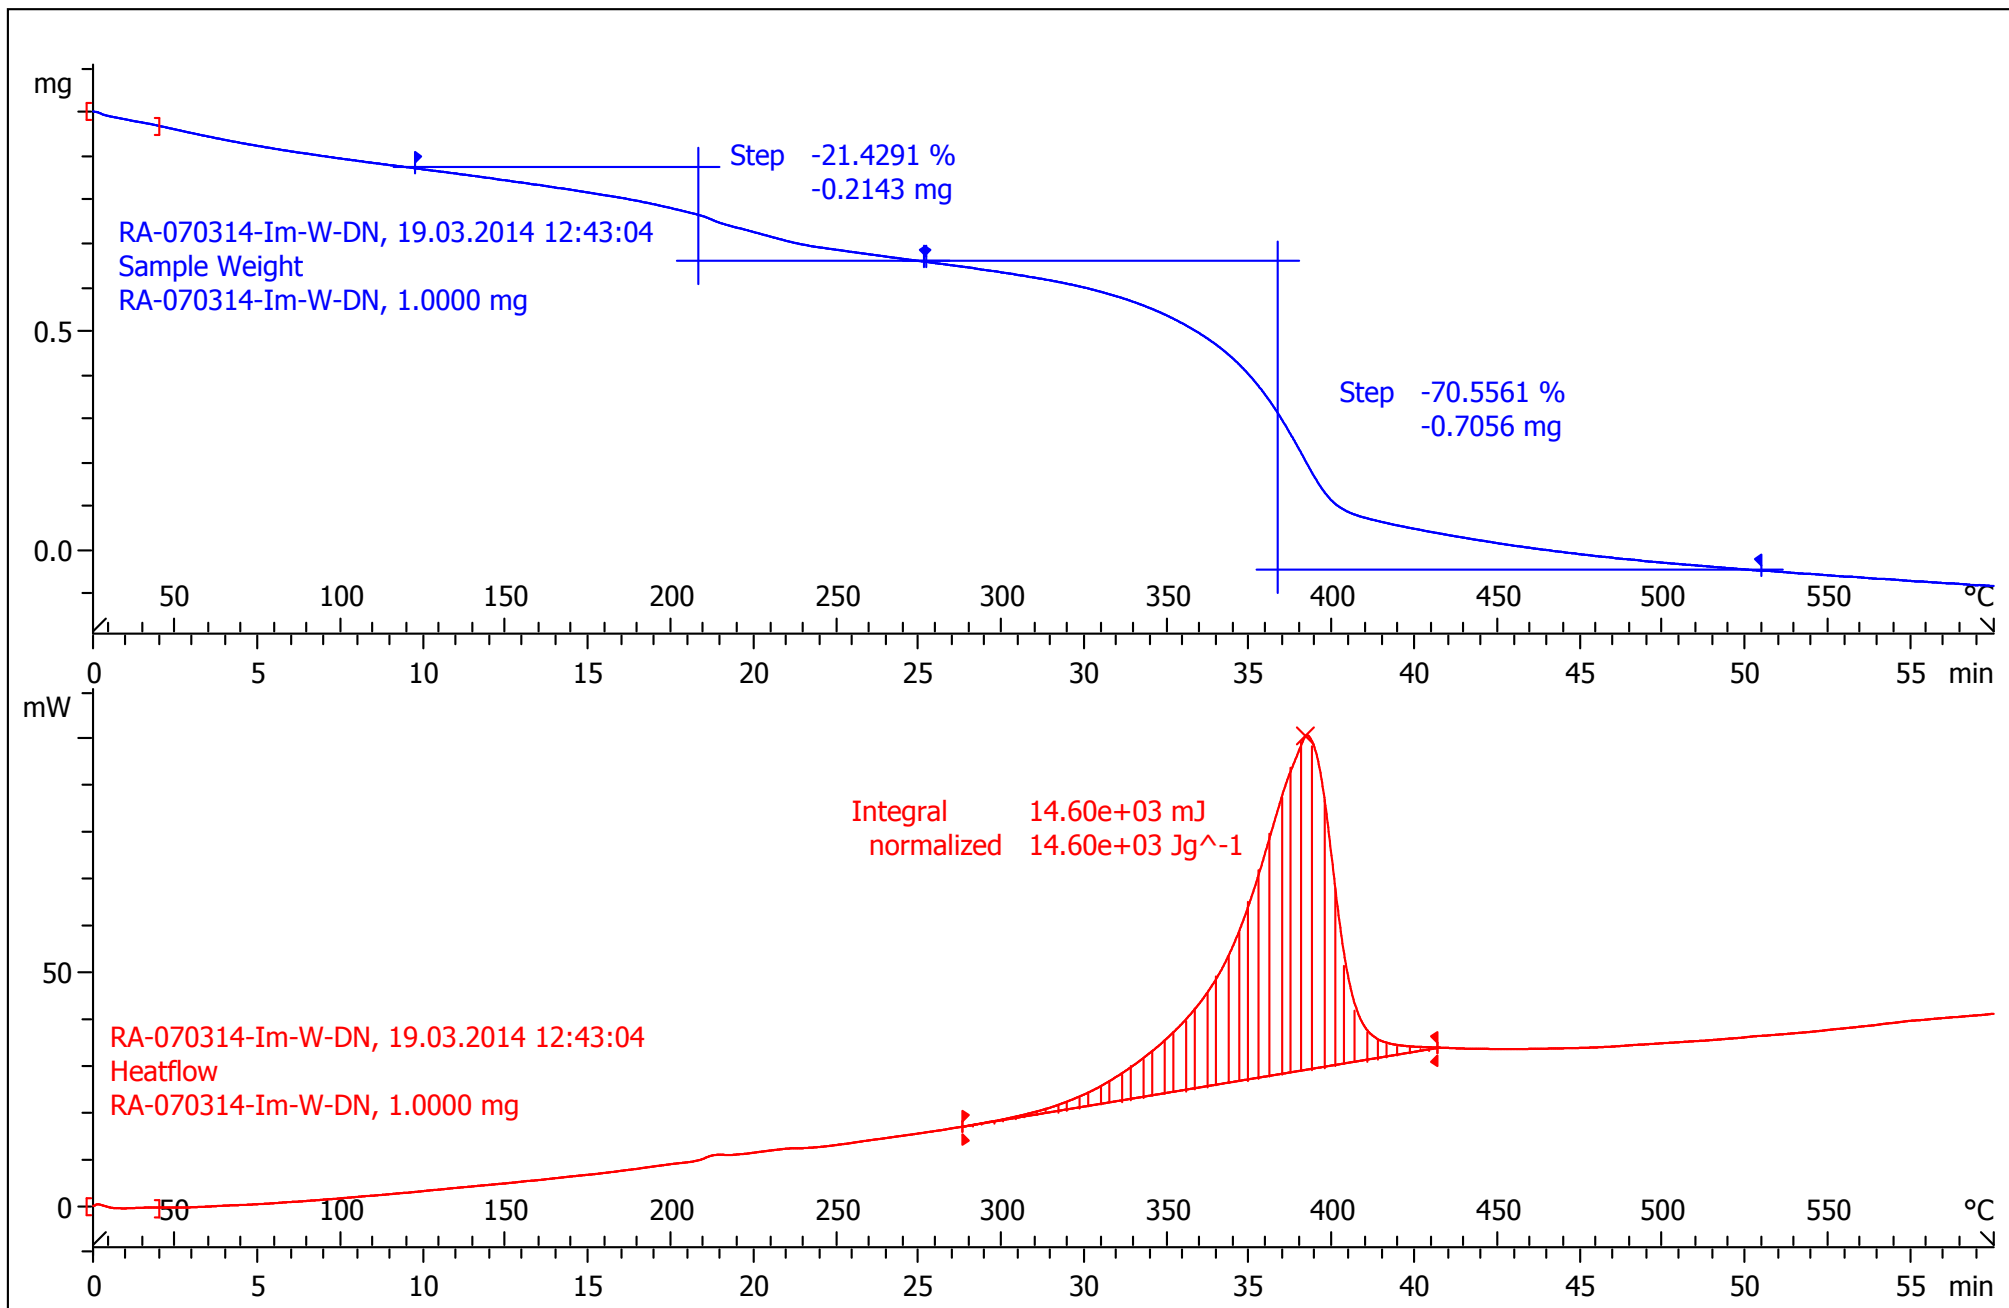

CIRIMAT: METTLER

STAR® SW 10.00

^exo

130619-AT7+MW

19.06.2013 10:55:14

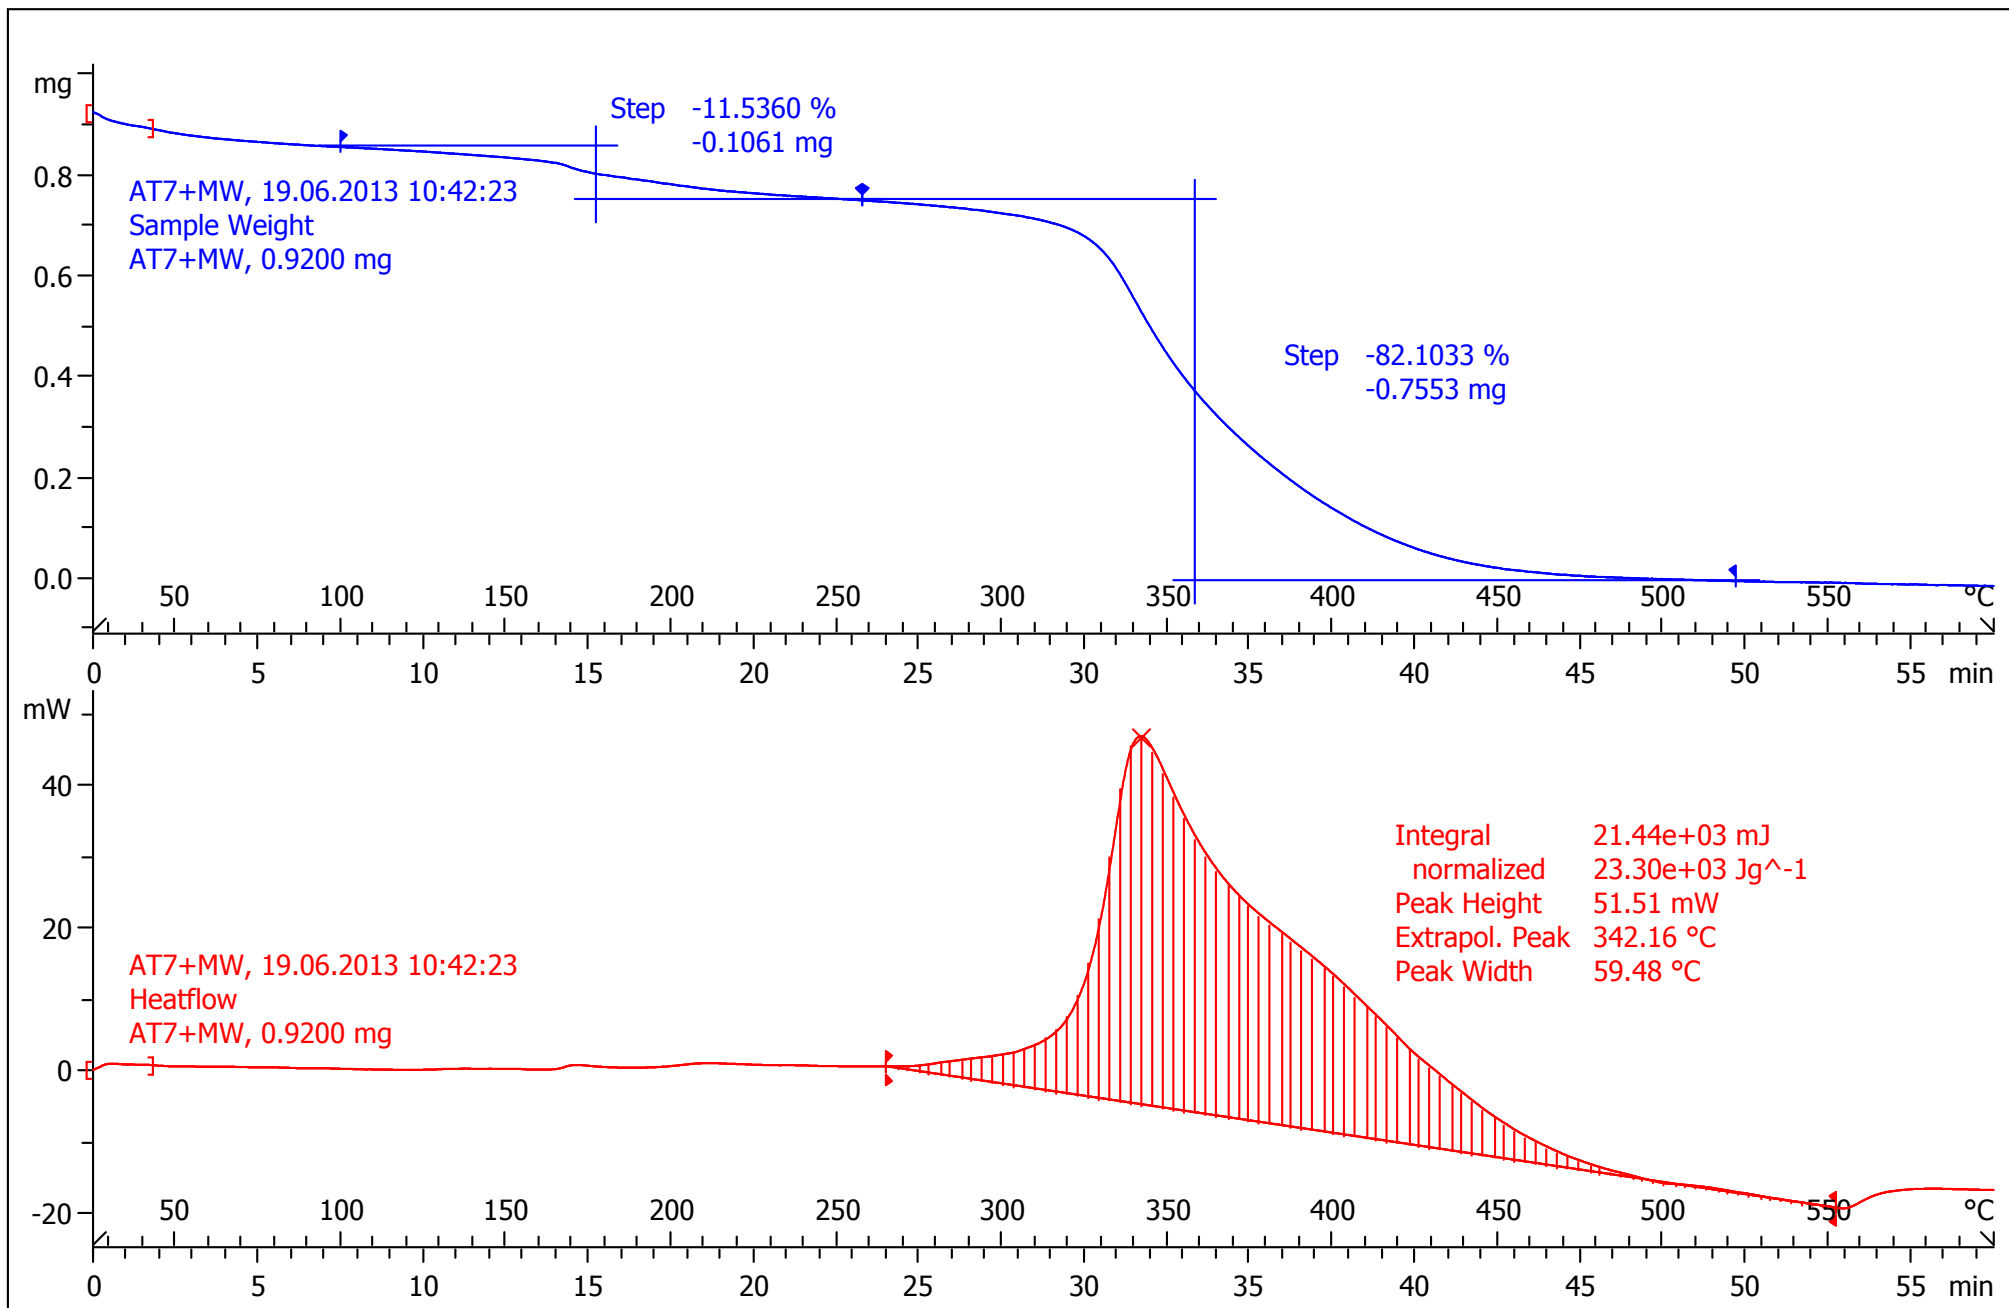

CIRIMAT: METTLER

STAR<sup>®</sup> SW 10.00

exo

RAT-8L

17.06.2013 10:02:27

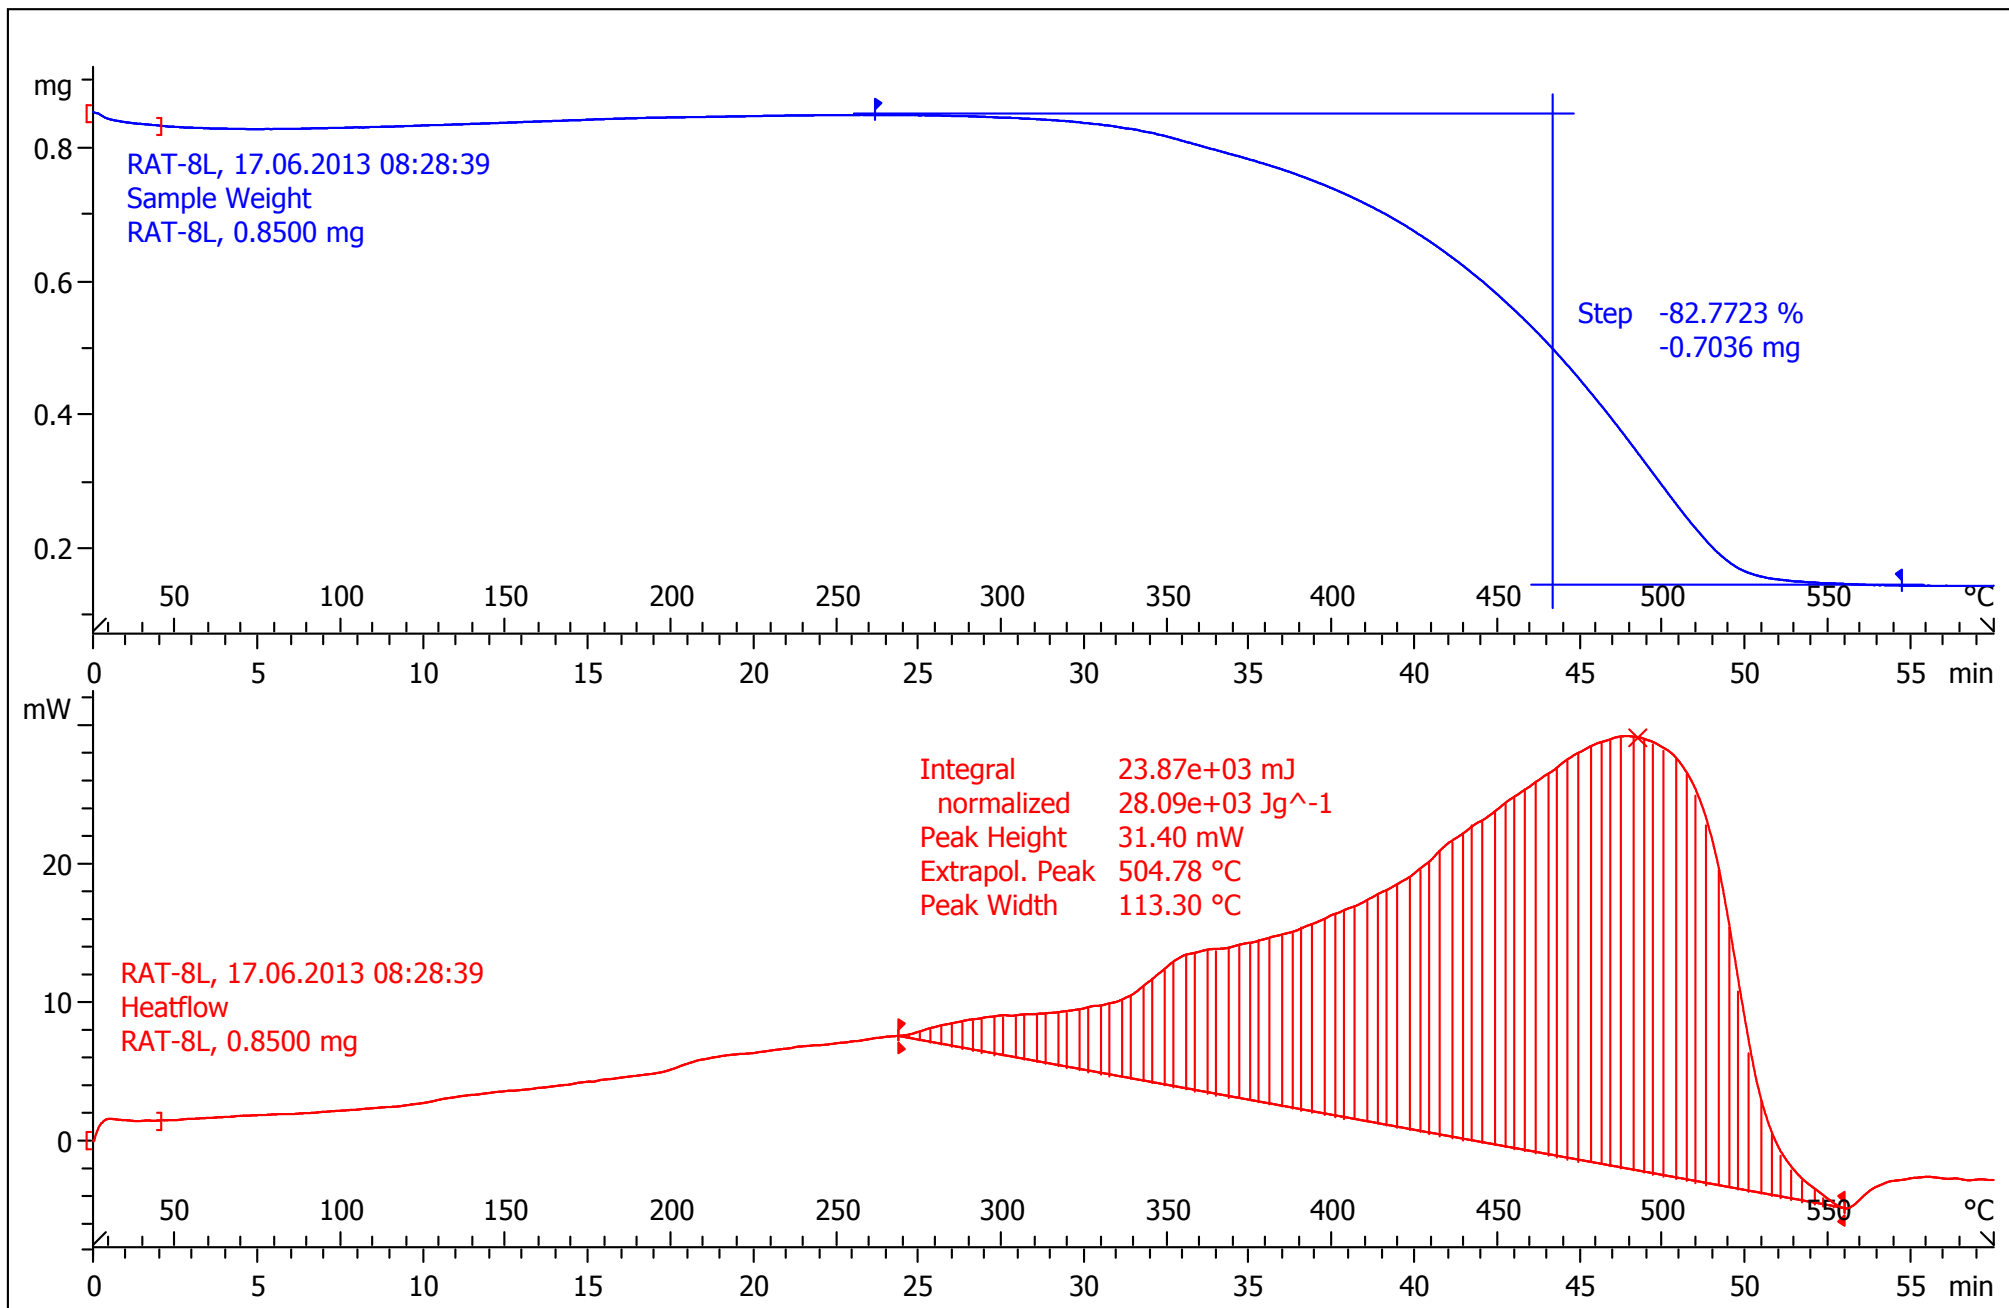

CIRIMAT: METTLER

STAR<sup>®</sup> SW 10.00

**^exo**

**130604-AT6+NF**

**05.06.2013 07:12:31**

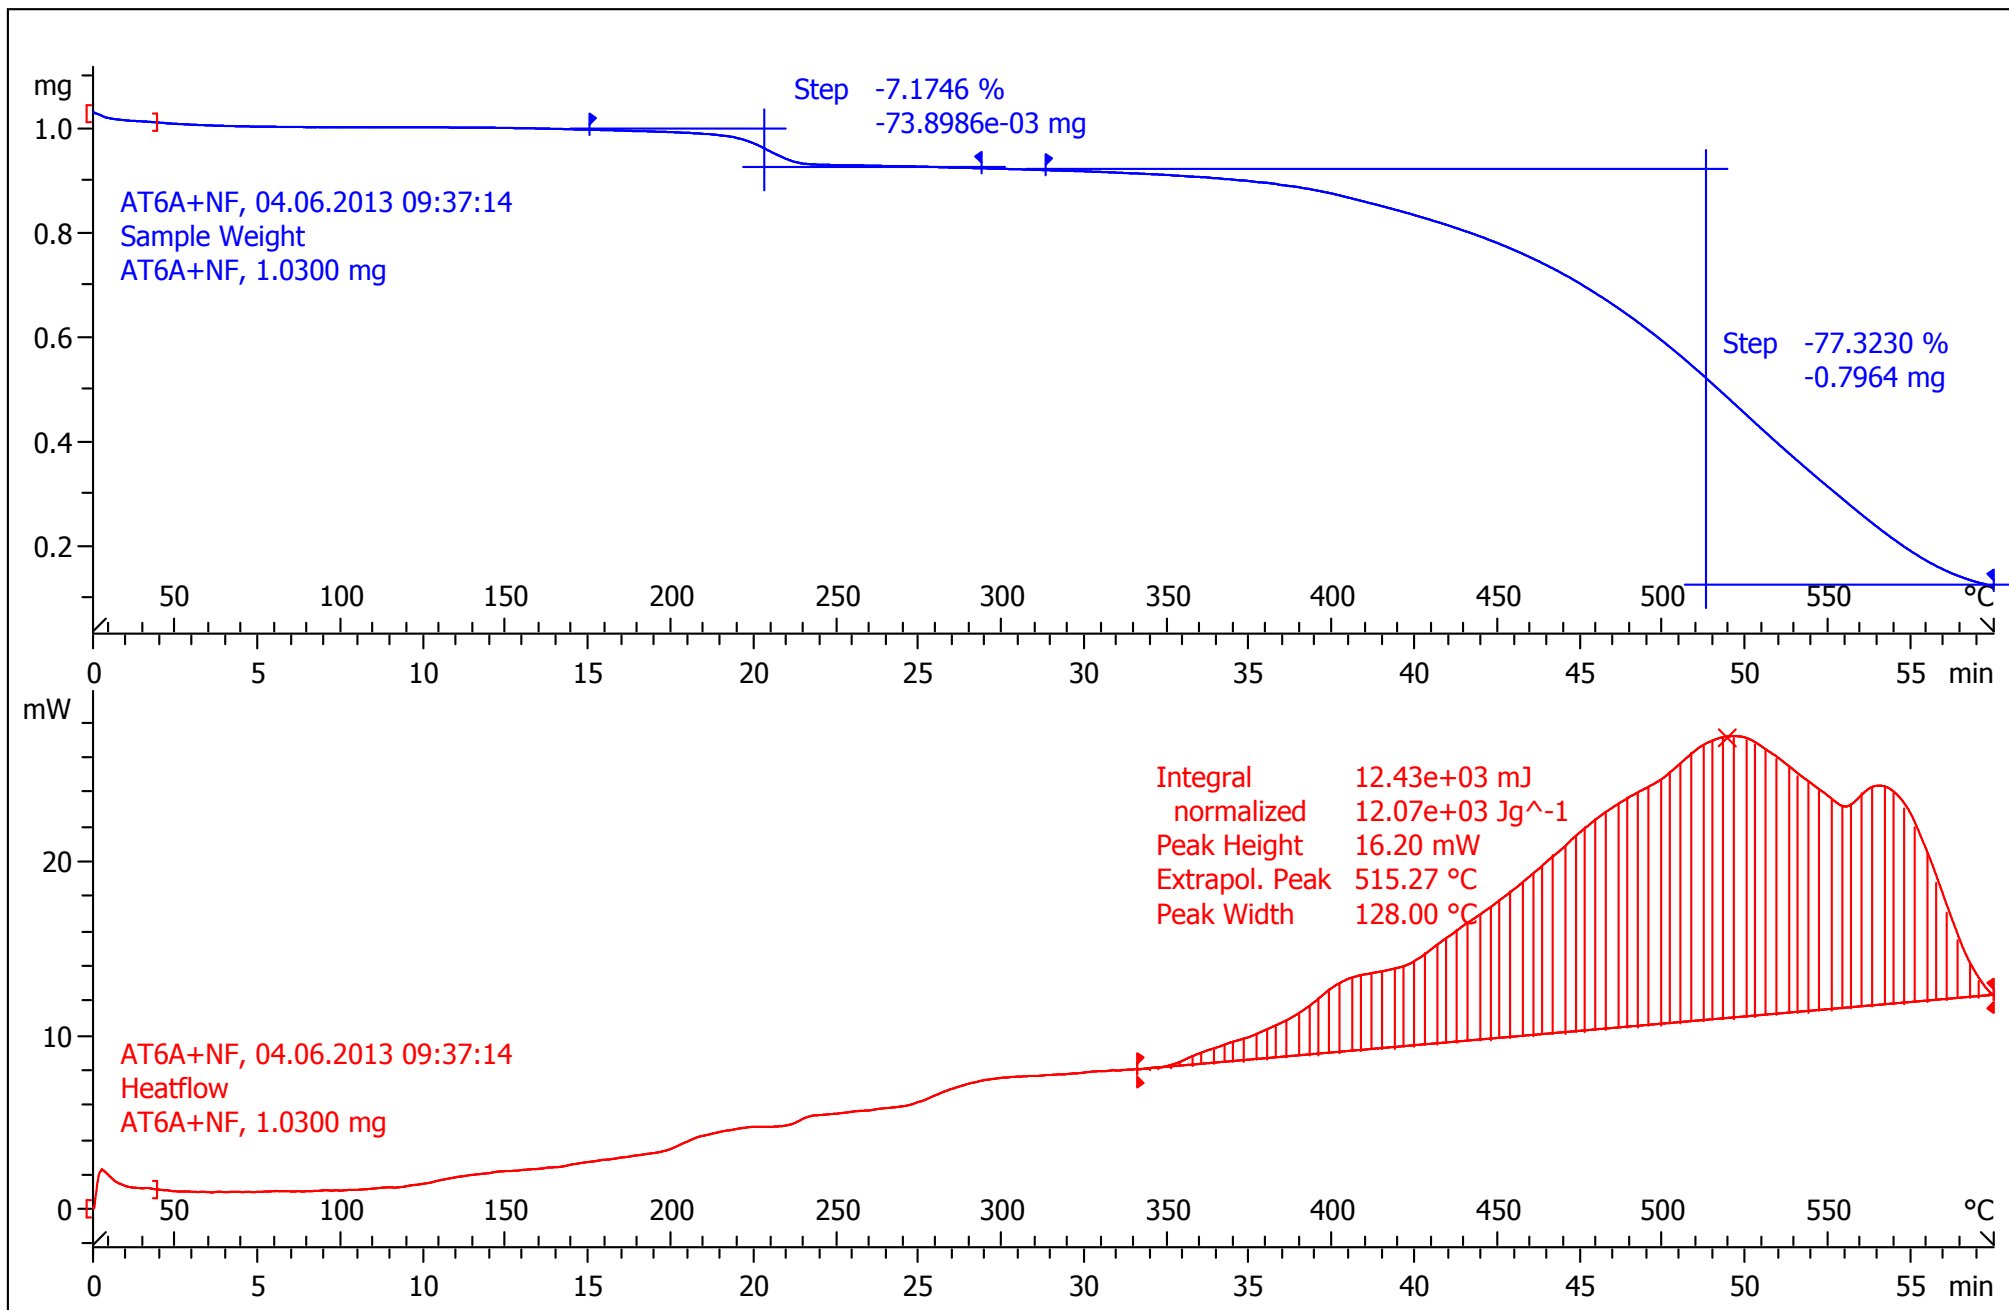

**CIRIMAT: METTLER**

**STAR<sup>®</sup> SW 10.00**
